# Supplementary material
Source: Springer Nature journal article supplement (https://www.springermedizin.de/resource/supplementary/13013_2010_404_MOESM1_ESM.pdf/9631640)
Supplement: MOESM1 [file 9631640]

150 juvenile patients treated with the SpineCor System

```
graph TD; A[150 juvenile patients treated with the SpineCor System] --> B[83 juvenile patients are still actively being treated]; A --> C[67 juvenile patients with a definite outcome]; C --> D[25 juvenile patients needed surgery (37.3%)]; C --> E[4 juvenile patients withdrawn (5.9%)]; C --> F[24 juvenile patients have at least 2 years of follow-up]; C --> G[14 juvenile patients weaned but with less than 2 years of follow-up];
```

83 juvenile patients are still actively being treated

**67 juvenile patients with a definite outcome**

25 juvenile patients needed surgery (37.3%)

4 juvenile patients withdrawn (5.9%)

24 juvenile patients have at least 2 years of follow-up

14 juvenile patients weaned but with less than 2 years of follow-up
